# Supplementary material for: Fungal infections in adult patients on extracorporeal life support
Source: Springer Nature journal article supplement (doi:10.1186/s13054-018-2023-z), 2018-04-17
Supplement: MOESM1 [file 15703588]

**APPENDIX 1 – ELSO Registry Case Report Form**

**ECLS Registry Form  
Extracorporeal Life Support Organization (ELSO)**

Center ID: \_\_\_\_\_ Center name: \_\_\_\_\_ Run No \_\_\_\_\_  
(for this patient)

Unique ID: \_\_\_\_\_ Birth Date/Time \_\_\_\_\_  
Month d, yyyy hh:mm

Sex: \_\_\_\_\_ (M, F) Race: \_\_\_\_\_ (Asian, Black, Hispanic, White, Other)

**Neonatal patients:**

Birth weight: \_\_\_\_\_ kg Maternal age: \_\_\_\_\_

Apgar (1 min): \_\_\_\_\_ Apgar (5 min): \_\_\_\_\_

Delivery:  Vaginal  C-sect  Elective C-sect

Gestational age: \_\_\_\_\_

CDH present?  (Check if yes) If Yes: Prenatal diagnosis?  (Check if yes)

Side of CDH: \_\_\_\_\_ (R,L,B) Repair:  None  Pre-ECLS  On ECLS  Post-ECLS

Infant Transported?  (Check if yes) Cardiac arrest at birth?  (Check if yes)

**Diagnoses and Procedures**

**ICD-9 Codes**

Primary diagnosis: \_\_\_\_\_ Use ICD-9 codes for diagnoses  
(see diagnosis codes sheet)

Secondary diagnoses: \_\_\_\_\_  
(unlimited) \_\_\_\_\_

**CPT Code**

**Date/Time of Procedure**

Procedures: \_\_\_\_\_ Use CPT codes for procedures  
(unlimited) \_\_\_\_\_  
(see procedure codes sheet)

(List all relevant procedures related to the patient even if preceding this admission)

**Cultured Organisms:**

(unlimited)

Organism: \_\_\_\_\_ Site: \_\_\_\_\_ Date/Time \_\_\_\_\_

Sites: Blood, Bone, Cerebrospinal fluid, Peritoneal fluid, Pleural fluid, Respiratory tract, Skin/soft tissue, Stool, Urine, Wound – surgical, Wound – traumatic, Other, Unknown

**Pre-ECLS Course**

Date / Time admitted: \_\_\_\_\_ Intubated: \_\_\_\_\_  
(to ECLS center) Month d, yyyy hh:mm Month d, yyyy hh:mm

Current weight (kg): \_\_\_\_\_

Patient Transported:  Pre-ECLS cardiac arrest:  Bridge to transplant:

Pre-ECLS support: \_\_\_\_\_ (Use Support Codes)

**Pre-ECLS blood gases:**

Date/Time: \_\_\_\_\_ (Worst in last 6 hours)

pH: \_\_\_\_\_ PaCO2: \_\_\_\_\_ PaO2: \_\_\_\_\_ HCO3: \_\_\_\_\_ SaO2(%): \_\_\_\_\_

**Pre-ECLS ventilator settings:**

Date/Time: \_\_\_\_\_ (Worst in last 6 hours)

Rate/Hz: \_\_\_\_\_ FiO2(%): \_\_\_\_\_ PIP/Ampl: \_\_\_\_\_ PEEP: \_\_\_\_\_ MAP: \_\_\_\_\_

Hand bagging:  (check if yes) Vent type:  Conventional  HFO  Other HFV

**Pre-ECLS hemodynamics:**

Date/Time: \_\_\_\_\_ (Worst in last 6 hours)

BP: \_\_\_\_\_ SvO2: \_\_\_\_\_ PCWP: \_\_\_\_\_  
Systolic Diastolic Mean

PAP: \_\_\_\_\_ CI: \_\_\_\_\_  
Systolic Diastolic Mean

**ECLS Course**

Date/Time on ECLS: \_\_\_\_\_ Date/Time off ECLS: \_\_\_\_\_  
Month d, yyyy hh:mm Month d, yyyy hh:mm

Reason for support:  Pulmonary  Cardiac  ECPR

ECLS mode: \_\_\_\_\_  
(VA, VA+V, VA-VV, VV, VV-VA, VVA, VVDL, VVDL+V, Other)

Cannulations:

| Site  | Percutaneous                 | Manufacturer | Size (Fr) | Length (cm) |
|-------|------------------------------|--------------|-----------|-------------|
| _____ | <input type="checkbox"/> Yes | _____        | _____     | _____       |
| _____ | <input type="checkbox"/> Yes | _____        | _____     | _____       |
| _____ | <input type="checkbox"/> Yes | _____        | _____     | _____       |

Site: RCCA, LCCA, RIJVC, RIJVC, LIJVC, RFA, LFA, RFV, LFV, RA, LA, PA, Aorta, Other

Equipment used:

Membrane lung: \_\_\_\_\_

Heat exchanger: \_\_\_\_\_

Pump: \_\_\_\_\_

Hemofilter: \_\_\_\_\_

Pump flow: Units:  ml/kg/min  ml/min  L/min (Check one)

4<sup>th</sup> hour flow: \_\_\_\_\_ 24<sup>th</sup> hour: \_\_\_\_\_

24 hour ECLS blood gases:

Date/Time: \_\_\_\_\_ (Best values at 24 hours of ECLS)

pH: \_\_\_\_\_ PaCO<sub>2</sub>: \_\_\_\_\_ PaO<sub>2</sub>: \_\_\_\_\_ HCO<sub>3</sub>: \_\_\_\_\_ SaO<sub>2</sub>(%): \_\_\_\_\_

24 hour ECLS ventilator settings:

Date/Time: \_\_\_\_\_ (Best values at 24 hours of ECLS)

Rate/Hz: \_\_\_\_\_ FiO<sub>2</sub>(%): \_\_\_\_\_ PIP/Ampl: \_\_\_\_\_ PEEP: \_\_\_\_\_ MAP: \_\_\_\_\_

Hand bagging:  (check if yes) Vent type:  Conventional  HFO  Other HFV

24 hour hemodynamics:

Date/Time: \_\_\_\_\_ (Best values at 24 hours of ECLS)

BP: \_\_\_\_\_ SvO<sub>2</sub>: \_\_\_\_\_ PCWP: \_\_\_\_\_  
Systolic Diastolic Mean

PAP: \_\_\_\_\_ Cl: \_\_\_\_\_  
Systolic Diastolic Mean

## ECLS Complications

### Mechanical complications: (requiring change of equipment or intervention)

- |                                             |                                                 |                                               |
|---------------------------------------------|-------------------------------------------------|-----------------------------------------------|
| <input type="checkbox"/> Oxygenator failure | <input type="checkbox"/> Raceway rupture        | <input type="checkbox"/> Other tubing rupture |
| <input type="checkbox"/> Pump malfunction   | <input type="checkbox"/> Heat exch. Malfunction | <input type="checkbox"/> Clots: oxygenator    |
| <input type="checkbox"/> Clots: bridge      | <input type="checkbox"/> Clots: bladder         | <input type="checkbox"/> Clots: hemofilter    |
| <input type="checkbox"/> Clots: other       | <input type="checkbox"/> Air in circuit         | <input type="checkbox"/> Cracks: connectors   |
| <input type="checkbox"/> Cannula problems   |                                                 |                                               |

### Patient complications:

#### Hemorrhagic complications: (requiring transfusion or other intervention)

- |                                                            |                                                    |                                                 |
|------------------------------------------------------------|----------------------------------------------------|-------------------------------------------------|
| <input type="checkbox"/> GI hemorrhage                     | <input type="checkbox"/> Cannulation site bleeding | <input type="checkbox"/> Surgical site bleeding |
| <input type="checkbox"/> Hemolysis (plasma hgb > 50 mg/dl) |                                                    | <input type="checkbox"/> DIC                    |

#### Neurologic complications:

- |                                                |                                                |                                       |
|------------------------------------------------|------------------------------------------------|---------------------------------------|
| <input type="checkbox"/> Clinical brain death  | <input type="checkbox"/> Clinical seizures     | <input type="checkbox"/> EEG seizures |
| <input type="checkbox"/> Infarction (US or CT) | <input type="checkbox"/> Hemorrhage (US or CT) |                                       |

#### Renal complications:

- |                                             |                                           |                                       |
|---------------------------------------------|-------------------------------------------|---------------------------------------|
| <input type="checkbox"/> Creatinine 1.5-3.0 | <input type="checkbox"/> Creatinine > 3.0 | <input type="checkbox"/> Hemodialysis |
| <input type="checkbox"/> Hemofiltration     | <input type="checkbox"/> CAVHD            |                                       |

#### Pulmonary complications: (requiring intervention)

- |                                       |                                               |
|---------------------------------------|-----------------------------------------------|
| <input type="checkbox"/> Pneumothorax | <input type="checkbox"/> Pulmonary hemorrhage |
|---------------------------------------|-----------------------------------------------|

#### Cardiopulmonary complications: (requiring intervention)

- |                                                                       |                                             |                                             |
|-----------------------------------------------------------------------|---------------------------------------------|---------------------------------------------|
| <input type="checkbox"/> Inotropes on ECLS                            |                                             | <input type="checkbox"/> CPR required       |
| <input type="checkbox"/> Myocardial stun by echocardiography          |                                             | <input type="checkbox"/> Cardiac arrhythmia |
| <input type="checkbox"/> Hypertension requiring vasodilator treatment |                                             | <input type="checkbox"/> PDA: R→L           |
| <input type="checkbox"/> PDA: L→R                                     | <input type="checkbox"/> PDA: Bidirectional | <input type="checkbox"/> PDA: Unknown       |
| <input type="checkbox"/> Tamponade: Blood                             | <input type="checkbox"/> Tamponade: Serous  | <input type="checkbox"/> Tamponade: Air     |

#### Infectious complications:

- |                                                                                                         |                                      |
|---------------------------------------------------------------------------------------------------------|--------------------------------------|
| <input type="checkbox"/> Culture proven new infection<br>(code organism under Diagnosis and Procedures) | <input type="checkbox"/> WBC < 1,500 |
|---------------------------------------------------------------------------------------------------------|--------------------------------------|

#### Metabolic complications:

- |                                       |                                                                                        |                                    |
|---------------------------------------|----------------------------------------------------------------------------------------|------------------------------------|
| <input type="checkbox"/> Glucose < 40 | <input type="checkbox"/> Glucose > 240                                                 | <input type="checkbox"/> pH < 7.20 |
| <input type="checkbox"/> pH > 7.60    | <input type="checkbox"/> Hyperbilirubinemia (> 2 direct, > 13 indirect, or > 15 total) |                                    |

**Outcome**

Reason for discontinuing ECLS:     Recovery (survived ECMO)     Died on ECLS, or ECLS withdrawn in anticipation of death

If died on ECLS or ECLS withdrawn in anticipation of death select 1 reason:     Parental or family request  
 Hemorrhage  
 Diagnosis incompatible with life  
 Irreversible organ failure: (Select all that apply)

CNS     Pulmonary     Cardiac  
 Liver     Infection     Other

Cannula site repair:     None     Carotid artery     Jugular vein     Both     Other

Date / time of final extubation: \_\_\_\_\_

Discharged alive (from ECLS center)

Date / time of discharge / transfer: \_\_\_\_\_

Discharge location:     Home     In-hospital service  
 Referral hospital     Other facility (hospital or rehab facility)

Date / time of death: \_\_\_\_\_

If death, code primary cause of death and contributing causes under Diagnosis and Procedures

Form completed by: \_\_\_\_\_ Date completed: \_\_\_\_\_

ELSO Office, 2800 Plymouth Rd, Building 300, Room 303, Ann Arbor, MI 48109-2800 Phone: 734-998-6601

## APPENDIX 2 – Patient Selection

- ICD9 diagnosis

Primary or Secondary diagnosis < 1 day after the initiation of ECMO:

- 112.4 Candidal pneumonia
- 112.5 Systemic candidiasis
- 112.81 Candidal endocarditis
- 112.83 Candidal meningitis
- 114.0 Primary coccidioidomycosis (pulmonary)
- 115\* Histoplasmosis
- 116\* Blastomycotic infection
- 117.1 Sporotrichosis
- 117.3 Aspergillosis
- 117.5 Cryptococcosis
- 117.6 Allescheriosis [Petriellidosis]
- 117.7 Zygomycosis [Phycomycosis or Mucormycosis]
- 117.8 Infection by dematiaceous fungi [Phaeophomycosis]
- 117.9 Other and unspecified mycoses
- 484.6 Pneumonia in aspergillosis

- Organisms ID:

|    |                              |
|----|------------------------------|
| 50 | <i>Aspergillus fumigatus</i> |
| 51 | <i>Aspergillus sp.</i>       |
| 21 | <i>Candida albicans</i>      |
| 81 | <i>Candida krusei</i>        |
| 53 | <i>Candida parapsilosis</i>  |
| 99 | <i>Candida sp.</i>           |
| 82 | <i>Candida tropicalis</i>    |
| 41 | Yeast sp.                    |

### APPENDIX 3 – Details of *Aspergillus* involvement

|                                 | <b>n</b> |
|---------------------------------|----------|
| Aspergillosis Diagnosis         | 51       |
| Aspergillus Pneumonia Diagnosis | 24       |
| AspergillusBloodCult            | 29       |
| AspergillusRespCult             | 200      |
| AspergillusOtherCult            | 36       |



**APPENDIX 4 – Survival of patients according to number of cultures other than blood positive for *Candida***

| Number of cultures | Survival |
|--------------------|----------|
| 1                  | 53.1%    |
| 2                  | 52.3%    |
| 3                  | 55.0%    |

**APPENDIX 5 – Multiple Logistic Regression for *Aspergillus***

|                           | <b>Variable</b>              | <b>B</b> | <b>S.E.</b> | <b>Wald</b> | <b>df</b> | <b>Sig.</b> | <b>Exp(B)</b> |
|---------------------------|------------------------------|----------|-------------|-------------|-----------|-------------|---------------|
| Step 1                    | Age / 10 years               | -0.015   | 0.046       | 0.111       | 1         | 0.739       | 0.985         |
|                           | Male gender                  | 0.465    | 0.153       | 9.234       | 1         | 0.002       | 1.592         |
|                           | Weight                       | -0.141   | 0.033       | 18.488      | 1         | 0           | 0.869         |
|                           | Tobacco                      | 0.365    | 0.367       | 0.988       | 1         | 0.32        | 1.441         |
|                           | Chronic Pulmonary Disease    | -0.155   | 0.259       | 0.358       | 1         | 0.55        | 0.856         |
|                           | Diabetes                     | 0.14     | 0.258       | 0.295       | 1         | 0.587       | 1.15          |
|                           | CKD                          | -0.411   | 0.492       | 0.7         | 1         | 0.403       | 0.663         |
|                           | Chronic Liver Disease        | 0.703    | 0.557       | 1.59        | 1         | 0.207       | 2.019         |
|                           | Hematological malignancy     | 0.745    | 0.406       | 3.372       | 1         | 0.066       | 2.107         |
|                           | Non-hematological malignancy | 0.021    | 0.404       | 0.003       | 1         | 0.959       | 1.021         |
|                           | AKI                          | -0.158   | 0.195       | 0.652       | 1         | 0.419       | 0.854         |
|                           | Stroke                       | 0.202    | 0.58        | 0.121       | 1         | 0.728       | 1.223         |
|                           | Pancreatitis                 | -0.937   | 1.04        | 0.81        | 1         | 0.368       | 0.392         |
|                           | Acute Liver Disease          | 0.425    | 0.427       | 0.992       | 1         | 0.319       | 1.53          |
|                           | Tuberculosis                 | -1.184   | 1.076       | 1.209       | 1         | 0.271       | 0.306         |
|                           | HIV                          | -0.592   | 0.778       | 0.579       | 1         | 0.447       | 0.553         |
|                           | Viral Pneumonia              | 0.146    | 0.24        | 0.372       | 1         | 0.542       | 1.157         |
|                           | Aspiration Pneumonitis       | -1.144   | 0.531       | 4.65        | 1         | 0.031       | 0.318         |
|                           | ARDS                         | -0.322   | 0.211       | 2.345       | 1         | 0.126       | 0.724         |
|                           | Acute Resp Failure NOS       | -0.551   | 0.168       | 10.763      | 1         | 0.001       | 0.576         |
|                           | Cardiac Arrest               | -0.279   | 0.331       | 0.712       | 1         | 0.399       | 0.756         |
|                           | Inotropes/vasopressors       | 0.033    | 0.164       | 0.04        | 1         | 0.842       | 1.033         |
|                           | Steroids                     | 0.242    | 0.191       | 1.596       | 1         | 0.207       | 1.274         |
|                           | Plasmapheresis               | 0.837    | 0.825       | 1.028       | 1         | 0.311       | 2.309         |
|                           | Influenza                    | 0.879    | 0.183       | 23.046      | 1         | 0           | 2.408         |
|                           | Sepsis                       | 0.096    | 0.179       | 0.289       | 1         | 0.591       | 1.101         |
| Solid Organ Transplant    | 0.581                        | 0.235    | 6.123       | 1           | 0.013     | 1.788       |               |
| Renal Replacement Therapy | 0.032                        | 0.179    | 0.031       | 1           | 0.86      | 1.032       |               |

|         |                          |        |       |        |   |       |       |
|---------|--------------------------|--------|-------|--------|---|-------|-------|
|         | Non-viral Pneumonia      | -0.411 | 0.184 | 5.005  | 1 | 0.025 | 0.663 |
|         | Respiratory Support      | 0.918  | 0.225 | 16.607 | 1 | 0     | 2.504 |
|         | Heart Failure            | -0.127 | 0.223 | 0.324  | 1 | 0.569 | 0.881 |
|         | Constant                 | -1.616 | 0.401 | 16.242 | 1 | 0     | 0.199 |
| Step 22 | Male gender              | 0.441  | 0.148 | 8.901  | 1 | 0.003 | 1.554 |
|         | Weight / 10kg            | -0.136 | 0.032 | 18.215 | 1 | 0     | 0.873 |
|         | Hematological malignancy | 0.778  | 0.401 | 3.765  | 1 | 0.052 | 2.178 |
|         | Aspiration Pneumonitis   | -1.099 | 0.524 | 4.393  | 1 | 0.036 | 0.333 |
|         | ARDS                     | -0.29  | 0.204 | 2.028  | 1 | 0.154 | 0.748 |
|         | Acute Resp Failure NOS   | -0.548 | 0.16  | 11.708 | 1 | 0.001 | 0.578 |
|         | Influenza                | 0.909  | 0.175 | 26.887 | 1 | 0     | 2.482 |
|         | Solid Organ Transplant   | 0.605  | 0.228 | 7.031  | 1 | 0.008 | 1.831 |
|         | Non Viral Pneumonia      | -0.37  | 0.176 | 4.4    | 1 | 0.036 | 0.691 |
|         | Respiratory Support      | 1.013  | 0.184 | 30.442 | 1 | 0     | 2.755 |
|         | Constant                 | -1.762 | 0.293 | 36.112 | 1 | 0     | 0.172 |

### **Bootstrap Aspergillus Model**

| <b>Variable</b>               | <b>OR</b> | <b>CI.95</b> | <b>p-value</b> |
|-------------------------------|-----------|--------------|----------------|
| Male gender                   | 1.55      | 1.13-2.15    | 0.003          |
| Weight / 10kg                 | 0.87      | 0.82-0.92    | 0.001          |
| Hematological malignancy      | 2.18      | 0.81-5.05    | 0.056          |
| Aspiration Pneumonitis        | 0.33      | 0.08-0.70    | 0.022          |
| ARDS                          | 0.75      | 0.52-1.04    | 0.152          |
| Acute Respiratory Failure NOS | 0.58      | 0.41-0.75    | 0.001          |
| Influenza                     | 2.48      | 1.76-3.50    | 0.001          |
| Solid Organ Transplant        | 1.83      | 1.09-2.79    | 0.010          |
| Non-Viral Pneumonia           | 0.69      | 0.46-0.97    | 0.040          |
| Respiratory Support           | 2.75      | 1.92-3.93    | 0.001          |

**APPENDIX 6 – Multiple Logistic Regression for *Candida* bloodstream infection**

|        | <b>Variable</b>              | <b>B</b> | <b>S.E.</b> | <b>Wald</b> | <b>df</b> | <b>Sig.</b> | <b>Exp(B)</b> |
|--------|------------------------------|----------|-------------|-------------|-----------|-------------|---------------|
| Step 1 | Age / 10 years               | 0.118    | 0.051       | 5.319       | 1         | 0.021       | 1.125         |
|        | Male                         | 0.115    | 0.162       | 0.5         | 1         | 0.479       | 1.122         |
|        | Weight / 10 kg               | 0.055    | 0.027       | 4.059       | 1         | 0.044       | 1.057         |
|        | Tobacco                      | -0.555   | 0.436       | 1.617       | 1         | 0.203       | 0.574         |
|        | Chronic Pulmonary Disease    | 0.068    | 0.281       | 0.058       | 1         | 0.81        | 1.07          |
|        | Diabetes                     | -0.376   | 0.274       | 1.876       | 1         | 0.171       | 0.687         |
|        | CKD                          | 0.46     | 0.35        | 1.726       | 1         | 0.189       | 1.583         |
|        | Chronic Liver Disease        | -0.112   | 0.652       | 0.029       | 1         | 0.864       | 0.894         |
|        | Hematological malignancy     | 0.165    | 0.555       | 0.089       | 1         | 0.766       | 1.18          |
|        | Non-hematological malignancy | -0.136   | 0.427       | 0.101       | 1         | 0.751       | 0.873         |
|        | AKI                          | 0.011    | 0.197       | 0.003       | 1         | 0.954       | 1.012         |
|        | Stroke                       | -0.293   | 0.633       | 0.215       | 1         | 0.643       | 0.746         |
|        | Pancreatitis                 | 0.789    | 0.591       | 1.786       | 1         | 0.181       | 2.202         |
|        | Acute Liver Disease          | 0.282    | 0.366       | 0.591       | 1         | 0.442       | 1.325         |
|        | Tuberculosis                 | 0.445    | 0.793       | 0.314       | 1         | 0.575       | 1.56          |
|        | Viral Pneumonia              | -0.006   | 0.312       | 0           | 1         | 0.984       | 0.994         |
|        | Aspiration Pneumonitis       | -0.269   | 0.423       | 0.404       | 1         | 0.525       | 0.764         |
|        | ARDS                         | -0.279   | 0.243       | 1.312       | 1         | 0.252       | 0.757         |
|        | Acute Resp Failure NOS       | -0.052   | 0.173       | 0.089       | 1         | 0.766       | 0.95          |
|        | Cardiac Arrest               | -0.123   | 0.276       | 0.199       | 1         | 0.656       | 0.884         |
|        | Inotropes/vasopressors       | 0.055    | 0.187       | 0.086       | 1         | 0.77        | 1.056         |
|        | Steroids                     | -0.023   | 0.223       | 0.011       | 1         | 0.917       | 0.977         |
|        | Plasmapheresis               | -0.082   | 1.08        | 0.006       | 1         | 0.939       | 0.921         |
|        | Influenza                    | -0.118   | 0.239       | 0.245       | 1         | 0.621       | 0.888         |
|        | Sepsis                       | 0.532    | 0.179       | 8.815       | 1         | 0.003       | 1.702         |
|        | Solid Organ Transplant       | 0.205    | 0.279       | 0.538       | 1         | 0.463       | 1.228         |
|        | Renal Replacement Therapy    | 0.407    | 0.178       | 5.231       | 1         | 0.022       | 1.502         |
|        | Non-viral Pneumonia          | -0.305   | 0.201       | 2.313       | 1         | 0.128       | 0.737         |
|        | Respiratory Support          | -0.225   | 0.224       | 1.014       | 1         | 0.314       | 0.798         |
|        | Heart Failure                | -0.196   | 0.211       | 0.862       | 1         | 0.353       | 0.822         |
|        | Femoral cannula              | -0.049   | 0.167       | 0.088       | 1         | 0.767       | 0.952         |
|        | IABP                         | 0.309    | 0.25        | 1.531       | 1         | 0.216       | 1.362         |
| VAD    | 0.27                         | 0.395    | 0.469       | 1           | 0.493     | 1.31        |               |
| CBP    | -0.672                       | 0.372    | 3.257       | 1           | 0.071     | 0.511       |               |

|         |                           |        |       |        |   |       |       |
|---------|---------------------------|--------|-------|--------|---|-------|-------|
|         | Laparotomy                | 0.378  | 0.358 | 1.116  | 1 | 0.291 | 1.459 |
|         | Constant                  | -3.139 | 0.448 | 49.012 | 1 | 0     | 0.043 |
| Step 29 | Age /10 years             | 0.124  | 0.049 | 6.509  | 1 | 0.011 | 1.132 |
|         | Weight / 10 years         | 0.048  | 0.026 | 3.501  | 1 | 0.061 | 1.049 |
|         | Sepsis                    | 0.471  | 0.168 | 7.847  | 1 | 0.005 | 1.602 |
|         | Renal Replacement Therapy | 0.437  | 0.163 | 7.186  | 1 | 0.007 | 1.548 |
|         | Non Viral Pneumonia       | -0.352 | 0.193 | 3.321  | 1 | 0.068 | 0.704 |
|         | Intra-Aortic Balloon Pump | 0.377  | 0.223 | 2.865  | 1 | 0.091 | 1.458 |
|         | Cardiopulmonary Bypass    | -0.576 | 0.363 | 2.522  | 1 | 0.112 | 0.562 |
|         | Constant                  | -3.29  | 0.355 | 85.76  | 1 | 0     | 0.037 |

### **Bootstrap CBSI model**

| <b>Variable</b>           | <b>OR</b> | <b>CI.95</b> | <b>p-value</b> |
|---------------------------|-----------|--------------|----------------|
| Age /10 years             | 1.13      | 1.03-1.24    | 0.005          |
| Weight / 10 years         | 1.04      | 0.98-1.10    | 0.122          |
| Sepsis                    | 1.64      | 1.17-2.34    | 0.001          |
| Renal Replacement Therapy | 1.49      | 1.04-2.03    | 0.010          |
| Non-Viral Pneumonia       | 0.77      | 0.54-1.06    | 0.166          |
| Intra-Aortic Balloon Pump | 1.43      | 0.84-2.23    | 0.111          |
| Cardiopulmonary Bypass    | 0.62      | 0.27-1.09    | 0.142          |

**APPENDIX 7 – Multiple Logistic Regression for Survival**

|        | <b>Variable</b>              | <b>B</b> | <b>S.E.</b> | <b>Wald</b> | <b>df</b> | <b>Sig.</b> | <b>Exp(B)</b> |
|--------|------------------------------|----------|-------------|-------------|-----------|-------------|---------------|
| Step 1 | Age                          | -0.202   | 0.032       | 39.514      | 1         | 0           | 0.817         |
|        | Male                         | -0.083   | 0.102       | 0.659       | 1         | 0.417       | 0.92          |
|        | Weight                       | 0.045    | 0.019       | 5.518       | 1         | 0.019       | 1.046         |
|        | Tobacco                      | 0.352    | 0.251       | 1.958       | 1         | 0.162       | 1.421         |
|        | Chronic Pulmonary Disease    | -0.098   | 0.178       | 0.305       | 1         | 0.581       | 0.906         |
|        | Diabetes                     | 0.224    | 0.167       | 1.788       | 1         | 0.181       | 1.251         |
|        | CKD                          | 0.027    | 0.267       | 0.01        | 1         | 0.92        | 1.027         |
|        | Chronic Liver Disease        | -0.499   | 0.447       | 1.244       | 1         | 0.265       | 0.607         |
|        | Hematological malignancy     | -0.819   | 0.39        | 4.415       | 1         | 0.036       | 0.441         |
|        | Non-hematological malignancy | -0.218   | 0.284       | 0.593       | 1         | 0.441       | 0.804         |
|        | AKI                          | -0.129   | 0.13        | 0.975       | 1         | 0.323       | 0.879         |
|        | Stroke                       | -0.507   | 0.393       | 1.667       | 1         | 0.197       | 0.602         |
|        | Pancreatitis                 | 0.056    | 0.469       | 0.014       | 1         | 0.906       | 1.057         |
|        | Acute Liver Disease          | -0.271   | 0.267       | 1.029       | 1         | 0.31        | 0.763         |
|        | Tuberculosis                 | 0.321    | 0.58        | 0.306       | 1         | 0.58        | 1.378         |
|        | HIV                          | -2.327   | 0.777       | 8.97        | 1         | 0.003       | 0.098         |
|        | Viral Pneumonia              | -0.125   | 0.194       | 0.415       | 1         | 0.52        | 0.883         |
|        | Aspiration Pneumonitis       | 0.686    | 0.262       | 6.856       | 1         | 0.009       | 1.987         |
|        | ARDS                         | -0.387   | 0.148       | 6.865       | 1         | 0.009       | 0.679         |
|        | Acute Resp Failure NOS       | 0.012    | 0.11        | 0.011       | 1         | 0.917       | 1.012         |
|        | Cardiac Arrest               | -0.033   | 0.188       | 0.031       | 1         | 0.861       | 0.968         |
|        | Inotrope/vasopressor         | -0.074   | 0.115       | 0.413       | 1         | 0.52        | 0.929         |
|        | Steroids                     | -0.113   | 0.148       | 0.583       | 1         | 0.445       | 0.893         |
|        | Plasmapheresis               | -0.269   | 0.65        | 0.171       | 1         | 0.68        | 0.765         |
|        | Influenza                    | 0.481    | 0.15        | 10.321      | 1         | 0.001       | 1.617         |
|        | Sepsis                       | -0.198   | 0.124       | 2.523       | 1         | 0.112       | 0.821         |
|        | Solid Organ Transplant       | 0.318    | 0.189       | 2.85        | 1         | 0.091       | 1.375         |
|        | Renal Replacement Therapy    | -0.009   | 0.124       | 0.005       | 1         | 0.944       | 0.991         |
|        | Non-viral Pneumonia          | 0.278    | 0.124       | 5.033       | 1         | 0.025       | 1.32          |
|        | Heart Failure                | -0.053   | 0.139       | 0.147       | 1         | 0.702       | 0.948         |

|         |                                       |        |       |        |   |       |       |
|---------|---------------------------------------|--------|-------|--------|---|-------|-------|
|         | IABP                                  | -0.173 | 0.174 | 0.989  | 1 | 0.32  | 0.841 |
|         | VAD                                   | -0.236 | 0.298 | 0.628  | 1 | 0.428 | 0.79  |
|         | CBP                                   | 0.198  | 0.211 | 0.886  | 1 | 0.347 | 1.219 |
|         | Laparotomy                            | -0.376 | 0.272 | 1.906  | 1 | 0.167 | 0.687 |
|         | Candida Bloodstream Infection         | -0.733 | 0.157 | 21.791 | 1 | 0     | 0.48  |
|         | Aspergillus                           | -0.89  | 0.151 | 34.539 | 1 | 0     | 0.411 |
|         | Nitric Oxide                          | -0.614 | 0.145 | 17.934 | 1 | 0     | 0.541 |
|         | Epoprostenol                          | 0.081  | 0.249 | 0.107  | 1 | 0.744 | 1.085 |
|         | NMB                                   | 0.257  | 0.112 | 5.308  | 1 | 0.021 | 1.293 |
|         | Support Type                          |        |       | 12.875 | 2 | 0.002 |       |
|         | Cardiac Support                       | -0.447 | 0.154 | 8.447  | 1 | 0.004 | 0.64  |
|         | ECPR Support                          | -0.715 | 0.234 | 9.295  | 1 | 0.002 | 0.489 |
|         | Constant                              | 1.09   | 0.247 | 19.427 | 1 | 0     | 2.975 |
| Step 25 | Age /10 years                         | -0.205 | 0.031 | 44.048 | 1 | 0     | 0.814 |
|         | Weight / 10 years                     | 0.044  | 0.018 | 5.595  | 1 | 0.018 | 1.044 |
|         | Hematological malignancy              | -0.813 | 0.387 | 4.421  | 1 | 0.035 | 0.444 |
|         | Acute Kidney Injury                   | -0.186 | 0.118 | 2.474  | 1 | 0.116 | 0.83  |
|         | HIV                                   | -2.375 | 0.772 | 9.465  | 1 | 0.002 | 0.093 |
|         | Aspiration Pneumonitis                | 0.627  | 0.255 | 6.052  | 1 | 0.014 | 1.873 |
|         | ARDS                                  | -0.411 | 0.142 | 8.366  | 1 | 0.004 | 0.663 |
|         | Influenza                             | 0.513  | 0.145 | 12.448 | 1 | 0     | 1.67  |
|         | Sepsis                                | -0.219 | 0.121 | 3.293  | 1 | 0.07  | 0.803 |
|         | Solid Organ Transplant                | 0.315  | 0.183 | 2.947  | 1 | 0.086 | 1.37  |
|         | Non-Viral Pneumonia                   | 0.284  | 0.121 | 5.453  | 1 | 0.02  | 1.328 |
|         | Candida Bloodstream Infection         | -0.762 | 0.155 | 24.086 | 1 | 0     | 0.467 |
|         | Aspergillus colonization or infection | -0.917 | 0.15  | 37.487 | 1 | 0     | 0.4   |
|         | Nitric Oxide                          | -0.593 | 0.142 | 17.322 | 1 | 0     | 0.553 |
|         | Neuromuscular Blockers                | 0.233  | 0.105 | 4.898  | 1 | 0.027 | 1.262 |
|         | SupportType                           |        |       | 28.082 | 2 | 0     |       |
|         | Cardiac support                       | -0.52  | 0.118 | 19.359 | 1 | 0     | 0.595 |
|         | ECPR support                          | -0.795 | 0.204 | 15.204 | 1 | 0     | 0.452 |
|         | Constant                              | 1.011  | 0.229 | 19.527 | 1 | 0     | 2.75  |

### **Bootstrap Survival model**

| <b>Variable</b>                       | <b>OR</b> | <b>CI.95</b> | <b>p-value</b> |
|---------------------------------------|-----------|--------------|----------------|
| Age /10 years                         | 0.81      | 0.77-0.86    | 0.001          |
| Weight / 10 years                     | 1.04      | 1.00-1.09    | 0.026          |
| Hematological malignancy              | 0.43      | 0.18-0.88    | 0.038          |
| Acute Kidney Injury                   | 0.82      | 0.64-1.06    | 0.108          |
| HIV                                   | 0.09      | 0.00-0.22    | 0.002          |
| Aspiration Pneumonitis                | 1.93      | 1.23-3.23    | 0.008          |
| ARDS                                  | 0.66      | 0.50-0.87    | 0.003          |
| Influenza                             | 1.71      | 1.24-2.35    | 0.002          |
| Sepsis                                | 0.80      | 0.63-1.01    | 0.080          |
| Solid Organ Transplant                | 1.38      | 0.95-2.09    | 0.086          |
| Non-Viral Pneumonia                   | 1.32      | 1.03-1.69    | 0.023          |
| Nitric Oxide                          | 0.55      | 0.43-0.72    | 0.001          |
| Neuromuscular Blockers                | 1.27      | 1.02-1.58    | 0.022          |
| Cardiac support                       | 0.60      | 0.48-0.75    | 0.001          |
| ECPR                                  | 0.45      | 0.29-0.69    | 0.001          |
| Candida Bloodstream Infection         | 0.48      | 0.35-0.63    | 0.001          |
| Aspergillus colonization or infection | 0.40      | 0.31-0.51    | 0.001          |



**APPENDIX 8 – Case distribution by year**

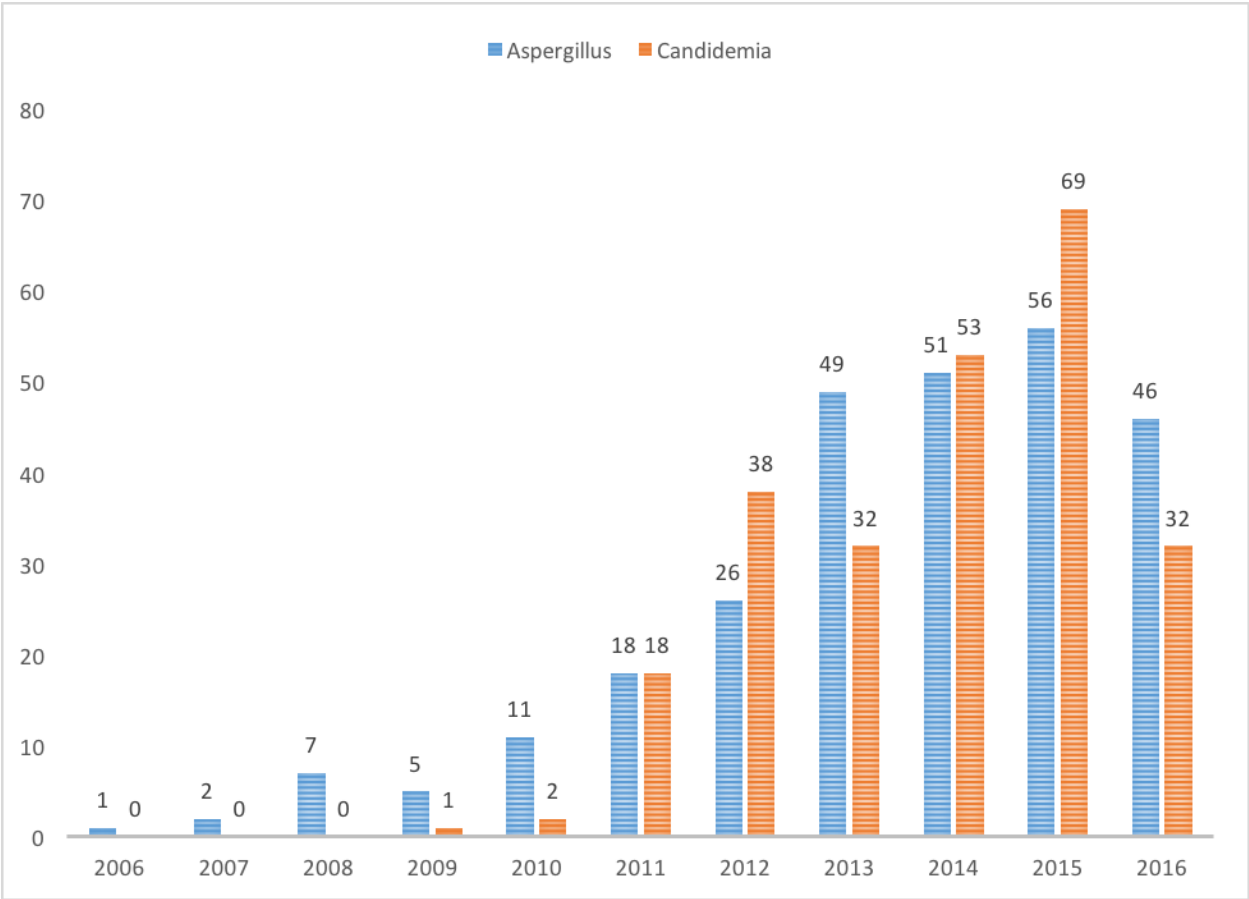

\*Please note patients were included up to September 2016.
